# Supplementary material for: Safety Assessment Review of a Dressing Assistance Robot
Source: Front Robot AI. 2021 Jun 14;8:667316. doi: 10.3389/frobt.2021.667316 (PMC8236579; doi:10.3389/frobt.2021.667316)
Supplement: Supplementary file 1 [file Table2.xlsx]

## Sheet: Table 1 Part 1
Guide Word	Definition
Omission	The service is never delivered, i. e. there is no communication
Commission	A service is delivered when not required, i. e. there is an unexpected communication
Early	The service (communication) occurs earlier than intended
Late	The service (communication) occurs later than intended
Value	The information (data) delivered has the wrong value

## Sheet: Table 1 Part 2
Hazard Severity Level	Description
no hazard	No safety related consequences
annoyance	No safety related consequences, but a loss of service performance that may cause annoyance (e.g. user waiting and becomes distracted)
low	Minor injury (discomfort, bruising)
medium	Moderate injury (small cut, abrasion)
high	Serious injury (strain, sprain, incapacitated)
