# Supplementary material for: Safety Assessment Review of a Dressing Assistance Robot
Source: Front Robot AI. 2021 Jun 14;8:667316. doi: 10.3389/frobt.2021.667316 (PMC8236579; doi:10.3389/frobt.2021.667316)
Supplement: Supplementary file 2 [file Table3.xlsx]

## Sheet: Sheet1
Task	Index	Description	Possible Causes	Effects	Detection & Protection	Justification or Design Recommendation	Hazard Level
UEA 01	S 01	Wrong task initiated	User said the wrong thing	Wrong task may be initiated	Take cues from other modalities	Use multimodal input for high probability	medium
						Implement HRI if in doubt
UEA 01	S 02	Forget key words	User memory issues	Task not started	Take cues from other modalities	Use multimodal input for high probability	annoyance
						Implement HRI if in doubt
UEA 01	S 03	Background noise interference	TV or radio on, unintended agent	Incorrect interpretation, unexpected robot behaviour	Check initiation of task with other modalities	Use multimodal input for high probability	medium
						Implement HRI if in doubt
UEA 02	S 04	User occludes visual system	User wanders in front of robot	User tracking lost	System must stop any movement	Regain tracking or implement HRI	low
UEA 02	S 05	Shoe/jacket not available	User picked or moved shoe	Garment tracking lost	Use proximity sensors, tell user to not occlude/ pick up garment or move around	Ask user where garment is	no hazard
UEA 02	S 06	Wrong gesture given	User confusion	Incorrect interpretation	Compare user intention from other modalities	Ask user to confirm if ambiguity exists not resolvable by multimodal inputs	low
UEA 03	S 07	User collision course	User loses balance	User at risk of injury	Offer balance support or reminder to be seated	Safety proximity sensors, compliance mode during all movement	high
UEA 03	S 08	Shoe/jacket not available	User picks up shoe/jacket	Task not started or pauses	Use proximity sensors, tell user to not occlude/ pick up garment or move around	Ask user to confirm if ambiguity exists not resolvable by multimodal inputs	annoyance
UEA 03	S 09	User moves shoe/jacket	User believes they are helping	Task segmentation lost	Use proximity sensors, tell user to not occlude/ pick up garment or move around	Ask user to remain still, confirm task segment through HRI if necessary	low
UEA 04	S 10	User takes shoe/jacket from EE	User pulls out of EE grip	EE moves with empty grip	Use proximity sensors, tell user to not occlude/ pick up garment or move around	Ask user to confirm if ambiguity exists not resolvable by multimodal inputs	low
UEA 04	S 11	User obstructs EE path	User wanders in front of robot	Task not started, potential collision with EE	Use proximity sensors, tell user to not occlude/ pick up garment or move around	Robot pauses if user moves when in close proximity	high
UEA 05	S 12	User moves	User loses balance	User at risk of injury	Use proximity sensors, tell user to not occlude/ pick up garment or move around	Promt user to remain still at certain points and especially during movement	medium
UEA 05	S 13	User occluded	User moves behind environment article	User tracking lost	Use proximity sensors, tell user to not occlude/ pick up garment or move around	If user tracking is lost use speech HRI	no hazard
UEA 05	S 14	Unsuitable pose	User does not understand workspace limits	Task not started or pauses	Use proximity sensors, tell user to not occlude/ pick up garment or move around	Use speech based HRI to get user into more appropriate pose	no hazard
UEA 05	S 15	Unintended agent	2nd actor enters stage	System tracks 2nd actor, system receives speech from 2nd actor, task not started, pauses	Ask if there is a 2nd actor or noise interference	Ask if there is a 2nd person in the room	no hazard
UEA 06	S 16	User moves	User loses balance, believe they are assisting	User tracking lost	Tell user to not occlude/ pick up garment or move around	Implement a non-rigid trajectory that can track the user movement during dressing	medium
				user injury
UEA 06	S 17	User obstructs path	User wanders in front of robot	User at risk of injury/collision	Use proximity sensors, tell user to not occlude/ pick up garment or move around	Track user position and define boundary where user is alerted (alarm) and/or define an emergency stop procedure	high
				task interrupted
UEA 06	S 18	User out of range	User wanders off	User tracking lost, task interrupted	Use proximity sensors, tell user to remain within range and in certain pose	Track user position and define boundary where user is alerted out of functioning range of the robot	no hazard
UEA 07	S 19	User moves/ changes pose	User loses balance, believe they are assisting	User tracking lost, task interrupted	Use proximity sensors, tell user to not occlude/ pick up garment or move around	Robot must adapt to changes in user position, consideration to how the user may help the robot too	medium
UEA 07	S 20	Foot/Arm out of range	User does not understand workspace limits	User tracking lost, task interrupted	Use proximity sensors, tell user to remain within range and in certain pose	Track user position and define boundary where user is alerted out of functioning range of the robot	low
UEA 07	S 21	Wrong foot/arm presented	Interpretation incorrect/confusion	Incorrect user interpretation, garment incorrectly dressed	Pose detection	Use multimodal input for high probability	low
						Implement HRI if in doubt
UEA 07	S 22	User already wearing garment	User confusion	User struggles dressing, High force experienced	Visual recognition system or current user garment	Garment detection of existing clothing may be difficult and out of scope, suggest using HRI to confirm if there is doubt	medium
UEA 08	S 23	User moves/ changes pose	User loses balance, believe they are assisting	Potential injury, task interrupted	Use proximity sensors, tell user to not occlude/ pick up garment or move around	Robot must adapt to changes in user position, consideration to how the user may help the robot too	high
UEA 08	S 24	Foot/Arm out of range	User does not understand workspace limits	Task interrupted	Tell user to remain within range and in certain pose	Remind user they are out of range, show picture or project boundary onto the floor (e.g. laser line)	annoyance
UEA 08	S 25	User already wearing garment	User confusion	User struggles dressing, High force experienced	Visual recognition system or current user garment	Garment detection of existing clothing may be difficult and out of scope, suggest using HRI to confirm if there is doubt	medium
UEA 08	S 26	Wrong feedback given	User confusion	Incorrect interpretation	Compare inputs from other modalities	Use multimodal input for high probability	medium
						Implement HRI if in doubt
UEA 09	S 27	User moves/ changes pose	User loses balance, believe they are assisting	User at risk of injury/collision	Use proximity sensors, tell user to not occlude/ pick up garment or move around	Robot must adapt to changes in user position, consideration to how the user may help the robot too	high
				task interrupted
UEA 10	S 28	User moves/ changes pose	User loses balance, believe they are assisting	User at risk of injury/collision	Use proximity sensors, tell user to not occlude/ pick up garment or move around	Robot must adapt to changes in user position, consideration to how the user may help the robot too	high
				task interrupted
UEA 10	S 29	User force too low	User mobility issues	Task cannot be completed	Use force detection	Use a force profile and lookup from user profile, if user force is too low may have to find external help (call someone)	low
UEA 10	S 30	User interpretation incorrect	User confusion	Incorrect interpretation	Compare inputs from other modalities	Use multimodal input for high probability	medium
						Implement HRI if in doubt
UEA 10	S 31	User override attempt	User believes they are helping	User tracking lost, Garment tracking lost, System sequence disordered	Compare inputs from other modalities	Use multimodal input for high probability	medium
						Implement HRI if in doubt
UEA 11	S 32	User moves/ changes pose	User loses balance, believe they are assisting	User at risk of injury/collision	Use proximity sensors, tell user to not occlude/ pick up garment or move around	Robot must adapt to changes in user position, consideration to how the user may help the robot too	high
				task interrupted
UEA 11	S 32	User override attempt	User believes they are helping	User tracking lost, Garment tracking lost, System sequence disordered	Compare inputs from other modalities	Use multimodal input for high probability	medium
						Implement HRI if in doubt
