# Supplementary material for: Safety Assessment Review of a Dressing Assistance Robot
Source: Front Robot AI. 2021 Jun 14;8:667316. doi: 10.3389/frobt.2021.667316 (PMC8236579; doi:10.3389/frobt.2021.667316)
Supplement: Supplementary file 4 [file Table4.xlsx]

## Sheet: Sheet1
Task	Index	Description	Possible Causes	Effects	Detection & Protection	Justification or Design Recommendation	Hazard Level
UEA 01	C 01	User changes mind	User updates decision based on new information or change of plan	User jumps to different task or segment of the task or task must stop	Use HRI and multimodal user intention module	Use multimodal input for high probability	medium
						Implement HRI if in doubt
UEA 02	C 02	User gives wrong command	User mis-spoke or was distracted	Task may procede to a different segment that the user intended	Confirm command input with user through HRI	All commands to be reviewed bu user if they are of significant potential hazard, otherwise no action required	medium
UEA 03	C 03	User wants different garment/shoe	User indicated wrong garment or changes mind	User may get the wrong garment or fitted incorrectly	Tracking or Left and Right shoe types or garment type and be able to restart dressing sequence if requested	Exit and restart dressing sequence with different garment required	no hazard
UEA 04	C 04	User becomes impatient	User personality	System less likely to be used	Perform actions in timely manner	Ensure robot can act with suitable response times	annoyance
UEA 05	C 05	User voice interrupts current process	User personality to talk over others	User intention is misrepresented or system does not hear the recent request	Listen for user voice even if talking	Use of bidirectional communication or robot always stops talking if user interrupts	no hazard
UEA 06	C 06	User gives unintended gesture	User is distracted, 2nd actor	May give unintended user intention	Confirm gesture action if score low probability	Use probability weighting on single modality inputs	low
UEA 07	C 07	User becomes distracted	External stimulii	User may collide with robot if moving	Monitor user attention	User attention should have direct interface with safety critical system responses	high
UEA 08	C 08	User gives the wrong feedback to the robot	Robot communication not clear	User may collide with robot if moving, get into the wrong task segment by misinterpreting the robots command	Give clear commands and supplement with on screen display where appropriate	Give mulitiple outputs to user when communicating	medium
