# Supplementary material for: Safety Assessment Review of a Dressing Assistance Robot
Source: Front Robot AI. 2021 Jun 14;8:667316. doi: 10.3389/frobt.2021.667316 (PMC8236579; doi:10.3389/frobt.2021.667316)
Supplement: Supplementary file 5 [file Table1.xlsx]

## Sheet: Sheet1
ID	Description
UR001	The system must respond to voice commands in <1s
UR002	The system must be able to determine the task type requested
UR005	The system must be able to identify garments using sensors specified
UR006	The system must be able to grasp the garment correctly and hold it in a suitable position for dressing
UR007	The system must be able to determine handedness or orientation of the garment
UR008	The system must be able to detect the user and environment to within +/-5mm
UR009	The system must be able to detect and differentiate arms, legs and torso with onboard sensors and processing
UR010	The system must be able to move the garment towards the user
UR011	The system must be able to track the position of the target limb through small movements +/-200mm
UR012	The system must be able to detect dressing errors based on force limitations
UR013	The system must be able to initiate HRI strategies based on error detection
UR014	The system must know when a dressing task is complete
UR015	The system must contain a user profile that can be adapted during learning and operation
UR016	The system must be able to learn dressing motions in learning mode and during opetation
UR017	The system must employ a safety executive function at all times
