# Supplementary material for: Safety Assessment Review of a Dressing Assistance Robot
Source: Front Robot AI. 2021 Jun 14;8:667316. doi: 10.3389/frobt.2021.667316 (PMC8236579; doi:10.3389/frobt.2021.667316)
Supplement: Supplementary file 6 [file Table5.xlsx]

## Sheet: Sheet1
UML Task	Index	Guide Word	Deviation	Possible Causes	Effects	Detection & Protection	Justification or Design Recommendation	Hazard Level
UML 01	R 01	Omission	Request not received	- Microphone not working	Dressing task not initiated	User testing	- good microphone	no hazard
				- Activation word not in vocabulary			- good speech API
				- Voice not loud enough			- directional microphone
UML 01	R 02	Commission	Request starts without authorisation	Background noise or voice misinterpreted	Task initiated		2 stage task initiation verification	annoyance
UML 01	R 03	Early	n/a	n/a	n/a	n/a	n/a	no hazard
UML 01	R 04	Late	Request takes long to process/ respond	CPU power or poor coding	User annoyance/ distraction	Timer checks in code and hardware testing	Implement timer checks in code to prevent long/infinite loops	annoyance
UML 01	R 05	Value	Wrong garment is inferred by robot	Interpretation of spoken words	Stuck in loop, robot may be moving while searching	Timer checks, implement user interaction	- Implement timer checks in code to prevent long/infinite loops	annoyance
							- Interact with user if task is taking long
UML 02	R 06	Omission	Process will halt	- garment not in visual vocabulary	Dressing task will interupt	Timer checks, implement user interaction	- check for long/infinit loop tasks	annoyance
				- cannot find garment			- Implement HRI assistance
UML 02	R 07	Commission	Robot will look for garment without user request	Wrong interpretation of user voice or background noise	Robot may start moving withoutuser's request/ knowledge	user request flag	2 stage flag verification of user request	low
UML 02	R 08	Early	n/a	n/a	n/a	n/a	n/a	no hazard
UML 02	R 09	Late	Request takes long to process/ respond	CPU power or poor coding	User could become distracted and forget robot is moving	Timer checks in code, announce to user when moving	- Sounder when robot is moving	annoyance
							- reminder to user that the robot is undertaking a specific task
UML 02	R 10	Value	Robot doesn't look for garment or looks for non-requested garment	- Process flow from request not complete	- robot may fetch wrong garment	User interaction	Implement HRI for garment verification with picture on screen/ or spoken	annoyance
				- Interpretation of user request	- robot may hang
UML 03	R 11	Omission	Robot never finds garment	Vision sensors issue, obstruction, item does not exist	user waiting	watchdog timer	- Implement timer checks in code to prevent long/infinite loops	annoyance
							- Interact with user if task is taking long
UML 03	R 12	Commission	Robot finds item incorrectly (logic error)	logic/ programming fault, software bug	robot will fetch item not there	check logic with other modalities, use HRI	2 stage task initiation verification	no hazard
UML 03	R 13	Early	Systems gets valid logic on node prior to completions of previous node	logic/ programming fault, software bug	robot will fetch item before request validated	check logic with other modalities, use HRI	2 stage task initiation verification	no hazard
UML 03	R 14	Late	System delay in getting confirmation	CPU overloaded, sensor latency	user waiting	watchdog timer	- Implement timer checks in code to prevent long/infinite loops	annoyance
							- Interact with user if task is taking long
UML 03	R 15	Value	Robot finds item incorrectly	logic/ programming fault, software bug	robot will fetch item not there	check logic with other modalities, use HRI	2 stage task initiation verification	no hazard
UML 04	R 16	Omission	Garment not picked up	robot/motor fault, cannot plan movement, sensor failure	user may get distracted/irritated	timer/HRI	- Implement timer checks in code to prevent long/infinite loops	annoyance
							- Interact with user if task is taking long
UML 04	R 17	Commission	Garment picked up without request made	logic failure, sensor failure/ interpretation error	user not expecting movement	Use HRI before movement	2 stage task initiation verification	high
UML 04	R 18	Early	Garment picked up prior to request validated	logic failure, sensor failure/ interpretation error	user not expecting movement	Use HRI before movement	2 stage task initiation verification	high
UML 04	R 19	Late	Garment picked up after request made (delay)	CPU overloaded, sensor latency	user may get distracted		- Implement timer checks in code to prevent long/infinite loops	annoyance
							- Interact with user if task is taking long
UML 04	R 20	Value	Wrong movement, wrong garment	logic failure, sensor failure/ interpretation error	robot may move EE into path of user	Use HRI before movement	2 stage task initiation verification	high
UML 05	R 21	Omission	n/a	n/a	n/a	n/a	n/a	n/a
UML 05	R 22	Commission	n/a	n/a	n/a	n/a	n/a	n/a
UML 05	R 23	Early	n/a	n/a	n/a	n/a	n/a	n/a
UML 05	R 24	Late	n/a	n/a	n/a	n/a	n/a	n/a
UML 05	R 25	Value	n/a	n/a	n/a	n/a	n/a	n/a
UML 06	R 26	Omission	n/a	n/a	n/a	n/a	n/a	n/a
UML 06	R 27	Commission	n/a	n/a	n/a	n/a	n/a	n/a
UML 06	R 28	Early	n/a	n/a	n/a	n/a	n/a	n/a
UML 06	R 29	Late	n/a	n/a	n/a	n/a	n/a	n/a
UML 06	R 30	Value	n/a	n/a	n/a	n/a	n/a	n/a
UML 07	R 31	Omission	n/a	n/a	n/a	n/a	n/a	n/a
UML 07	R 32	Commission	n/a	n/a	n/a	n/a	n/a	n/a
UML 07	R 33	Early	n/a	n/a	n/a	n/a	n/a	n/a
UML 07	R 34	Late	n/a	n/a	n/a	n/a	n/a	n/a
UML 07	R 35	Value	n/a	n/a	n/a	n/a	n/a	n/a
UML 08	R 36	Omission	Process will not start as user not detected	Proximity sensor failure, detection module failure	User not detected	Sensor testing in suitable environments	Use multiple sensors or multimodal	no hazard
UML 08	R 37	Commission	Process will continue when user is not there	Proximity sensor failure, detection module failure	User detected when not there	Sensor testing in suitable environments	Use multiple sensors or multimodal	low
UML 08	R 38	Early	n/a	-	-	-	-	no hazard
UML 08	R 39	Late	Pose detection starts late	CPU overloaded, sensor latency	user has to wait longer for pose detection to start	multiple testing	watchdog timers	annoyance
UML 08	R 40	Value	Binary output, cannot vary	-	-	-	-	no hazard
UML 09	R 41	Omission	User pose not detected	Sensor failure	Possible halt to process	multiple testing	Use multiple sensors or multimodal, implement HRI on timer	annoyance
UML 09	R 42	Commission	User pose found but invalid	Sensor failure, image distortion	Trajectory planning will use invalid information	multiple testing, multiple inputs	Use multiple sensors or multimodal, implement HRI on timer	high
UML 09	R 43	Early	n/a	-	-			no hazard
UML 09	R 44	Late	Pose detected late	CPU overloaded, sensor latency	User waiting	set time limits to maximum wait period	watchdog timers	annoyance
UML 09	R 45	Value	Wrong pose detected	Sensor failure, image distortion	Trajectory planning will use invalid information	multiple testing, multiple inputs	Use multiple sensors or multimodal, implement HRI on timer	high
UML 10	R 46	Omission	User pose not detected	Sensor failure	Possible halt to process	multiple testing	Use multiple sensors or multimodal, implement HRI on timer	annoyance
UML 10	R 47	Commission	User pose found but invalid	Sensor failure, image distortion	Trajectory planning will use invalid information	multiple testing, multiple inputs	Use multiple sensors or multimodal, implement HRI on timer	high
UML 10	R 48	Early	n/a	-	-			no hazard
UML 10	R 49	Late	Pose detected late	CPU overloaded, sensor latency	User waiting	set time limits to maximum wait period	watchdog timers	annoyance
UML 10	R 50	Value	Wrong pose detected	Sensor failure, image distortion	Trajectory planning will use invalid information	multiple testing, multiple inputs	Use multiple sensors or multimodal, implement HRI on timer	high
UML 11	R 51	Omission	Trajectory cannot be planned	Pose data never arrived	User is waiting	timer	watchdog timers	annoyance
UML 11	R 52	Commission	Trajectory data obtained but may be invalid or false	False pose information received from 2nd actor or environmnet	Robot may collide with user	additional sensors	Must validated pose through multimodal or HRI interaction	high
UML 11	R 53	Early	Trajectory data obtained but may be invalid or false on wrong pose information	False pose information received from 2nd actor or environmnet	Robot may collide with user	additional sensors	Must validated pose through multimodal or HRI interaction	high
UML 11	R 54	Late	Trajectory information takes a long time to be received	CPU overloaded, sensor latency	User is waiting	timer	watchdog timers	annoyance
UML 11	R 55	Value	The wrong trajectory is planned	False pose information received from 2nd actor or environmnet	Robot may collide with user	additional sensors	Must validated pose through multimodal or HRI interaction	high
UML 12	R 56	Omission	Trajectory cannot be planned	Pose data never arrived	User is waiting	timer	watchdog timers	annoyance
UML 12	R 57	Commission	Trajectory data obtained but may be invalid or false	False pose information received from 2nd actor or environmnet	Robot may collide with user	additional sensors	Must validated pose through multimodal or HRI interaction	high
UML 12	R 58	Early	Trajectory data obtained but may be invalid or false on wrong pose information	False pose information received from 2nd actor or environmnet	Robot may collide with user	additional sensors	Must validated pose through multimodal or HRI interaction	high
UML 12	R 59	Late	Trajectory information takes a long time to be received	CPU overloaded, sensor latency	User is waiting	timer	watchdog timers	annoyance
UML 12	R 60	Value	The wrong trajectory is planned	False pose information received from 2nd actor or environmnet	Robot may collide with user	additional sensors	Must validated pose through multimodal or HRI interaction	high
UML 13	R 61	Omission	Garment is not moved	Robot jammed, garment stuck, safety lock out	User waits	information flow check	watchdog timers	annoyance
UML 13	R 62	Commission	Garment moves with unexpected timing	False modality input(s)	Garment starts moving when user does not expect it	Movement required HRI confimation	Safety checking on modality inputs prior to any movement	high
UML 13	R 63	Early	Garment moves before trajectory is valid	False modality input(s)	Garment starts moving when user does not expect it	Movement required HRI confimation	Safety checking on modality inputs prior to any movement	high
UML 13	R 64	Late	Garment moves but after a period of delay	CPU load causes delay	User waits then garment starts moving	User may start to move and then collide when robot starts moving again	Safety checking on modality inputs prior to any movement	medium
UML 13	R 65	Value	Garment moves in wrong direction or other movement error	False modality input(s)	Movement is unexpected	Movement required HRI confimation	Safety checking on modality inputs prior to any movement	high
UML 14	R 66	Omission	Fault not detected	faulty sensor(s), incorrect sensor interpretation	Robot continues without notification of fault	HRI or learning	System should be sensitive to single modality errors until it can adapt to user	high
UML 14	R 67	Commission	Fault detected (false positive)	unexpected sensor input	Fault process enacted when there is no fault	Robot may stop or move slowly when it thinks there is an error	False positives may be the result of unexpected user movements, a learning profile may help mitigate	annoyance
UML 14	R 68	Early	Fault detected (false positive)	n/a	n/a	n/a	n/a	no hazard
UML 14	R 69	Late	Fault detected (data arrives late)	CPU overloaded, sensor latency	Fault acted upon with delay	User may struggle while system responds, catch with HRI or other modality	Must check errors through multimodal or HRI interaction	high
UML 14	R 70	Value	Wrong fault detected	faulty sensor(s), incorrect sensor interpretation	Wrong fault correction initiated	Robot performs wrong correction procedure	Must check errors through multimodal or HRI interaction	medium
UML 15	R 71	Omission	HRI request ignored	User not heard (speech)	Robot may continue to enact on previous command ignoring user	Give user feedback on requests made	Make inputs sensitive, user to wear headset to remove b/g noise	medium
UML 15	R 72	Commission	HRI request initiated (false request)	Wrong interpretation of background noise or 2nd actor	Robot may change behaviour (unexpected)	Give user feedback on requests made	Robot to stop and ask question	annoyance
UML 15	R 73	Early	HRI request initiated (false request)	Wrong interpretation of background noise or 2nd actor	Robot may change behaviour (unexpected)	Give user feedback on requests made	Robot to stop and ask question	annoyance
UML 15	R 74	Late	HRI request received late	CPU overloaded, sensor latency	Robot may not change behaviour as expected by user	Give user feedback on requests made	Check with user before performing potentially harmful actions	high
UML 15	R 75	Value	Wrong HRI interpretation	Speech interpretation module failure, gesture recognition failure	Robot will perform unexpected action	Give user feedback on requests made	Check with user before performing potentially harmful actions	high
UML 16	R 76	Omission	Roboto continues to dress after completion	Wrong trajectory, faulty sensor(s), wrong sensor interpretation	May result in excessive force	Multimodal inputs to check completion	Check finish point using multiple inputs where possible, use HRI if doubtful	high
UML 16	R 77	Commission	Dressing finishes early	Wrong trajectory, faulty sensor(s), wrong sensor interpretation	garment not on user properly, e.g. user may lose balance with shoe improperly fitted	Multimodal inputs to check completion	Check finish point using multiple inputs where possible, use HRI if doubtful	low
UML 16	R 78	Early	Dressing finishes early	Wrong trajectory, faulty sensor(s), wrong sensor interpretation	garment not on user properly	Multimodal inputs to check completion	Check finish point using multiple inputs where possible, use HRI if doubtful	low
UML 16	R 79	Late	Robot still operating but user believes dressing is complete	Robot continues to dress after completion	May result in excessive force	Multimodal inputs to check completion	Check finish point using multiple inputs where possible, use HRI if doubtful	high
UML 16	R 80	Value	n/a binary output	n/a	n/a	n/a	n/a	no hazard
UML 17	R 81	Omission	Robot does not detect garment snagging	Wrong force tolerance, sensor failure	Robot keeps moving with snagging error	Low sensor thresholds for snagging	Use low threshold values until stable learning data collected for user	high
UML 17	R 82	Commission	Robot falsly detects garment snagging	Faulty sensor(s), wrong sensor interpretation	Robot stops and asks question about snagging when there is no issue	Create learning dataset for errors to reduce false positives	Add error conditions to user profile	no hazard
UML 17	R 83	Early	n/a	n/a	n/a	n/a	n/a	no hazard
UML 17	R 84	Late	Robot does not detect garment snagging in time	Faulty sensor(s), wrong sensor interpretation	Robot keeps moving with snagging error	Low sensor thresholds for snagging	Give priority to error detection in software architecture	high
UML 17	R 85	Value	n/a	n/a	n/a	n/a	n/a	no hazard
UML 18	R 86	Omission	System does not recognise the need for new trajectory	Pose data never arrived	User is waiting	timer	watchdog timers	annoyance
UML 18	R 87	Commission	System believes need for new trajectory (falsely)	False pose information received from 2nd actor or environmnet	Robot may collide with user	additional sensors	Must validated pose through multimodal or HRI interaction	high
UML 18	R 88	Early	New trajectory requested before pose is determined	False pose information received from 2nd actor or environmnet	Robot may collide with user	additional sensors	Must validated pose through multimodal or HRI interaction	high
UML 18	R 89	Late	Trajectory information takes a long time to be received	CPU overloaded, sensor latency	User is waiting	timer	watchdog timers	annoyance
UML 18	R 90	Value	The wrong trajectory is planned	False pose information received from 2nd actor or environmnet	Robot may collide with user	additional sensors	Must validated pose through multimodal or HRI interaction	high
UML 19	R 91	Omission	System does not recognise the need for new pose	Sensor failure	Possible halt to process	multiple testing	Use multiple sensors or multimodal, implement HRI on timer	annoyance
UML 19	R 92	Commission	System believes new user pose needed	Sensor failure, image distortion	Trajectory planning will use invalid information, potential collision	multiple testing, multiple inputs	Use multiple sensors or multimodal, implement HRI on timer	high
UML 19	R 93	Early	System believes new user pose needed	Sensor failure, image distortion	Trajectory planning will use invalid information, potential collision	multiple testing, multiple inputs	Use multiple sensors or multimodal, implement HRI on timer	no hazard
UML 19	R 94	Late	System believes new user pose needed (late)	CPU overloaded, sensor latency	User waiting	set time limits to maximum wait period	watchdog timers	annoyance
UML 19	R 95	Value	Falsely believes user is in correct pose	Sensor failure, image distortion	Trajectory planning will use invalid information, potential collision	multiple testing, multiple inputs	Use multiple sensors or multimodal, implement HRI on timer	high
UML 20	R 96	Omission	Stops the user interaction/HRI	Sesnor failure, incorrect interpretation	User confused, HRI action not complete	Multimodal	Check user attention and intention through multimodal inputs	low
UML 20	R 97	Commission	The robot stops HRI mid-process	Sesnor failure, incorrect interpretation	User confused, HRI action not complete	Multimodal	Check user attention and intention through multimodal inputs	low
UML 20	R 98	Early	n/a	n/a	n/a	n/a	n/a	no hazard
UML 20	R 99	Late	Robot HRI interaction slow to start	CPU overloaded, sensor latency	User distracted, actions not taken quickly enough	Multimodal	Check user attention and intention through multimodal inputs	low
UML 20	R 100	Value	The HRI interface does not start	Sesnor failure, incorrect interpretation	HRI interaction does not start	Multimodal	Check user attention and intention through multimodal inputs	low
UML 21	R 101	Omission	Robot does not perform trajectory correction	Wrong sensor information, incorrect interpretation	Robot does not move or take corrective action	Use multimodal inputs, check user intention	Check user attention and intention through multimodal inputs	high
UML 21	R 102	Commission	Robot corrects a valid trajectory or pose	Wrong sensor information, incorrect interpretation	Robot collides with user	Use multimodal inputs, check user intention	Check user attention and intention through multimodal inputs, check pose prior to movement	high
UML 21	R 103	Early	Robot makes trajectory/pose correction during normal operation	Wrong sensor information, incorrect interpretation	Robot collides with user	Use multimodal inputs, check user intention	Check user attention and intention through multimodal inputs	high
UML 21	R 104	Late	Robot corrects a valid trajectory/pose with delay	Wrong sensor information, incorrect interpretation, CPU overload	Robot collides with user, user moves around/impatient	Use multimodal inputs, check user intention	Check user attention and intention through multimodal inputs	high
UML 21	R 105	Value	Robot makes wrong trajectory/pose correction	Wrong sensor information, incorrect interpretation	Robot collides with user	Use multimodal inputs, check user intention	Check user attention and intention through multimodal inputs	high
